# Supplementary material for: An Iron-NDC Framework with a Cage Structure and an Optothermal Conversion in NIR Window
Source: MDPI journal article supplement (doi:10.3390/molecules27248789), 2022-12-11
Supplement: s1 [file s1]

# **An iron-NDC framework with a cage structure and an optothermal conversion in NIR window**

Bin Tan <sup>1,2</sup>, Zhao-Feng Wu <sup>1,2,\*</sup> and Xiao-Ying Huang <sup>1,\*</sup>

<sup>1</sup> State Key Laboratory of Structural Chemistry, Fujian Institute of Research on the Structure of Matter, the Chinese Academy of Sciences, Fujian, Fuzhou, 350002, P.R. China

<sup>2</sup> Fujian Science & Technology Innovation Laboratory for Optoelectronic Information of China, Fujian, Fuzhou 350108, P. R. China

\* Correspondence: zfwu@fjirsm.ac.cn (Z.-F. Wu); xyhuang@fjirsm.ac.cn (X.-Y. Huang); Tel.: 0591-63173146 (X.-Y. Huang).

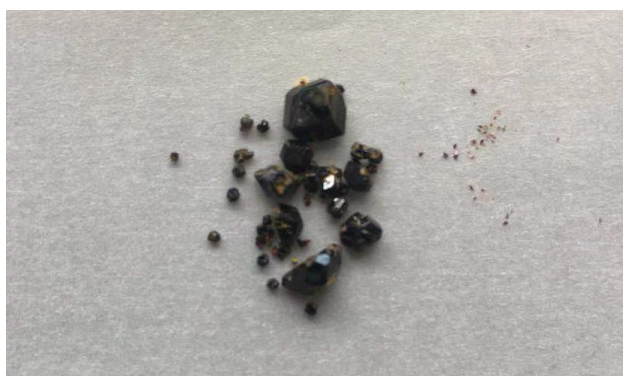

**Figure S1.** The image of crystals of **Fe-NDC**.

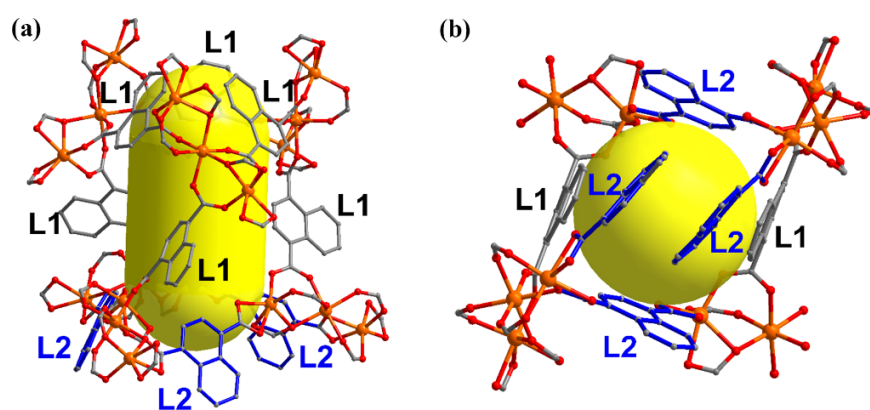

**Figure S2.** The structures for cage 1 and cage 2.

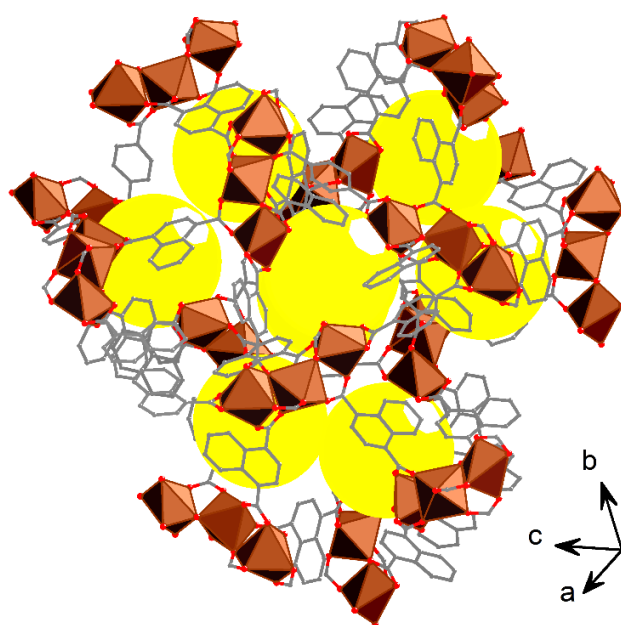

**Figure S3.** The structures for cage 1 surrounded with the same three neighboring cages.

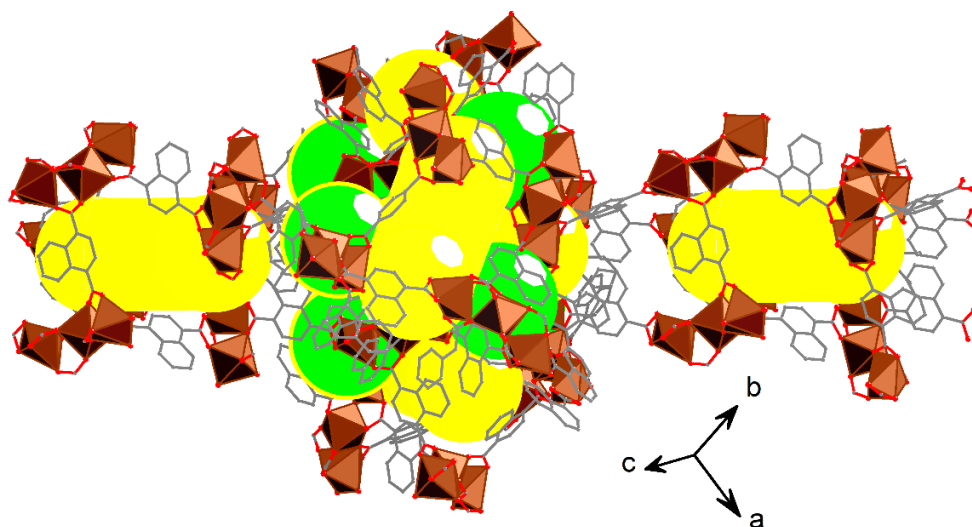

**Figure S4.** The 3D structures of Fe-NDC constructed with cages 1 and cages 2.

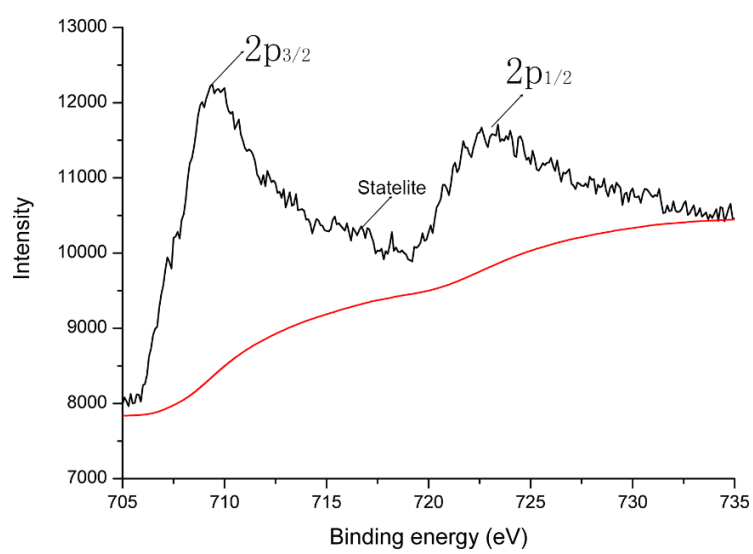

**Figure S5.** The XPS spectra of Fe (2p) in Fe-NDC.[S1]

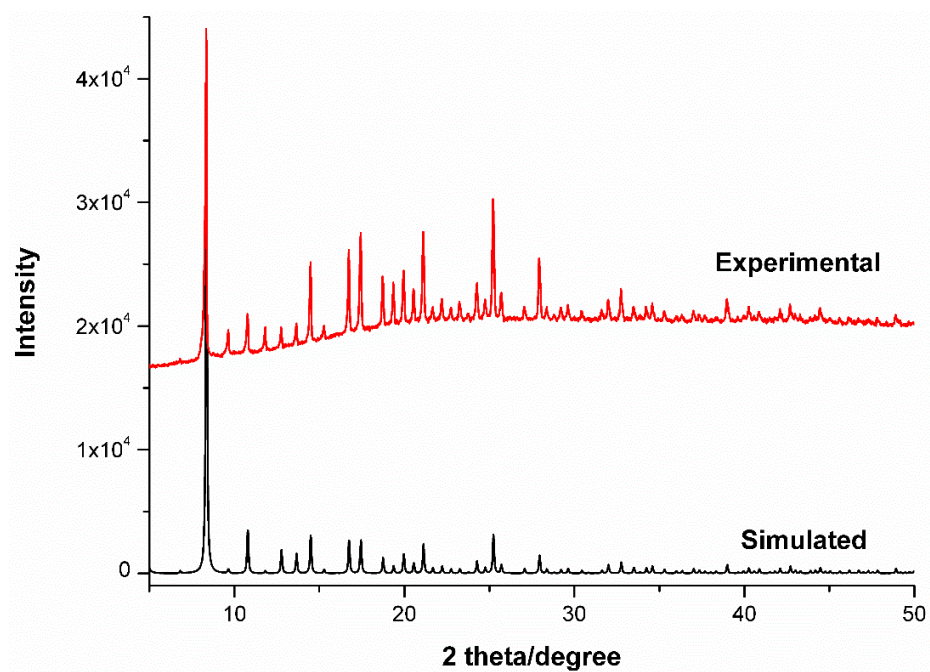

**Figure S6.** Experimental PXRD patterns of **Fe-NDC** compared with the simulated one.

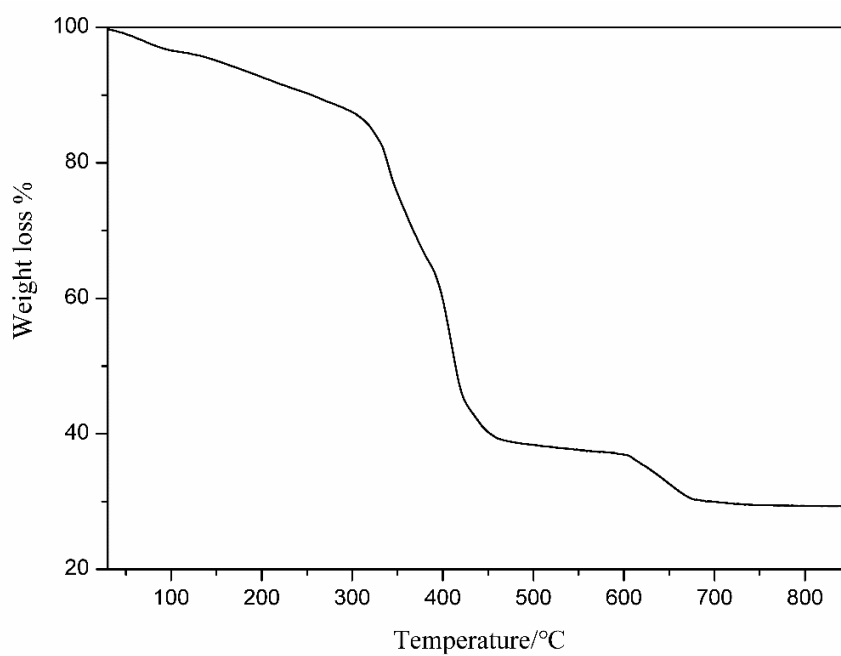

**Figure S7.** TG curve for **Fe-NDC**.

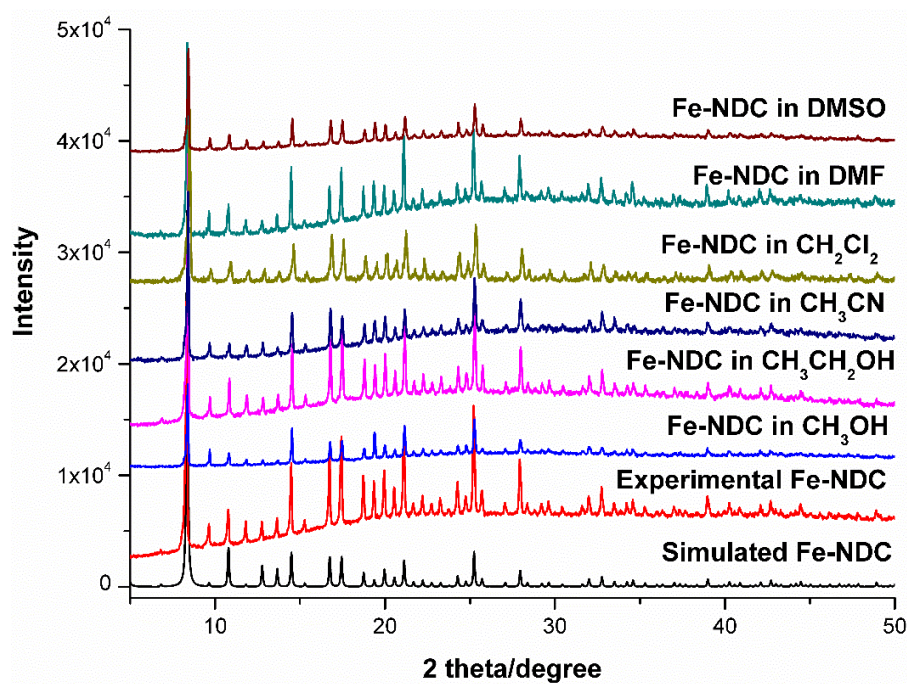

**Figure S8.** Experimental PXRD patterns of **Fe-NDC** under different solvents over 48 hours compared with the simulated **Fe-NDC**.

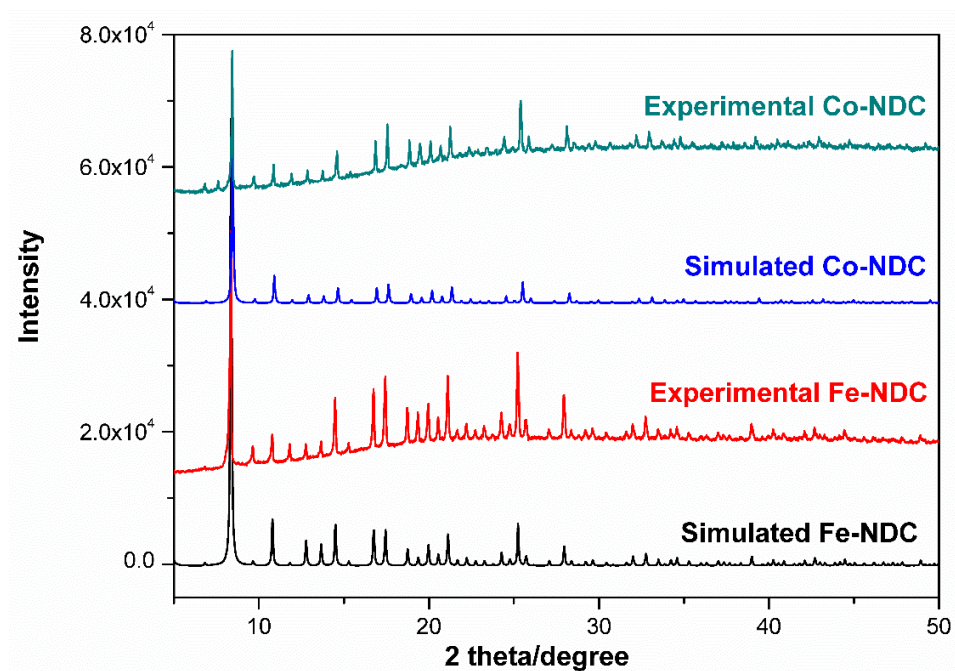

**Figure S9.** Experimental PXRD patterns of the isostructural **Co-NDC** compared with the simulated **Co-NDC**. The PXRD patterns of **Fe-NDC** are added for comparatively study.



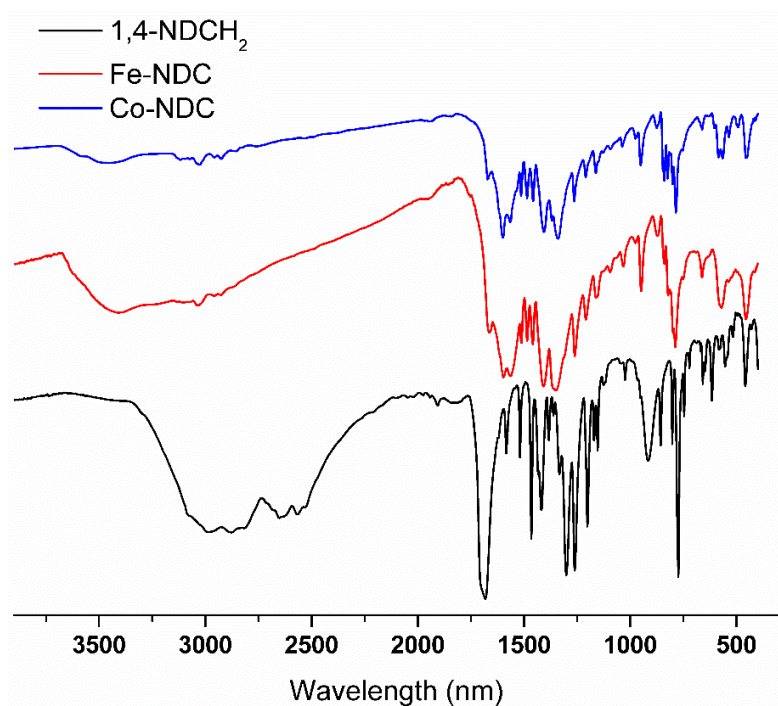

**Figure S10.** IR spectra of 1,4-NDCH<sub>2</sub> ligand, **Fe-NDC** and the isostructural **Co-NDC**.

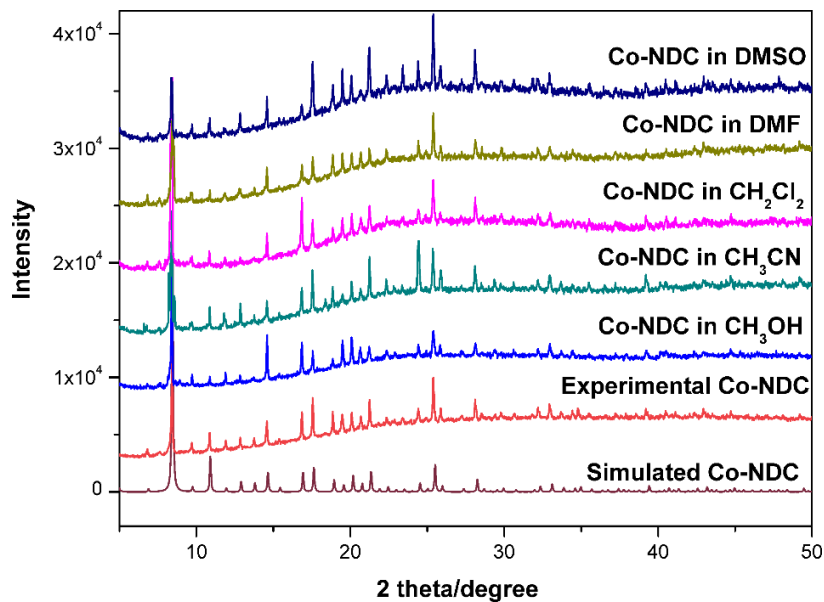

**Figure S11.** Experimental PXRD patterns of **Co-NDC** under different solvents over 48 hours compared with the simulated **Co-NDC**.

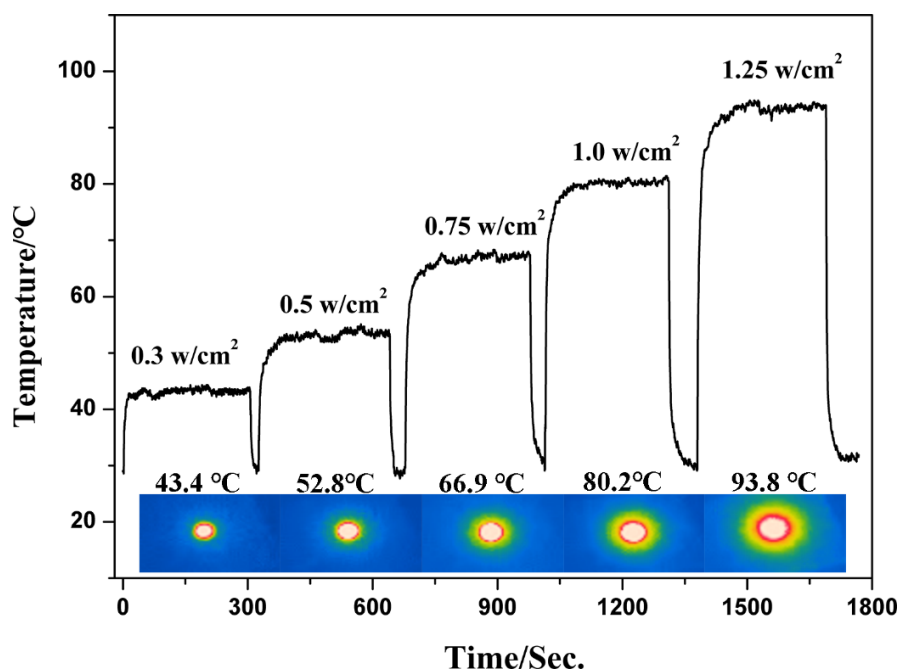

**Figure S12.** Photothermal conversion curves of **Co-NDC** under 808 nm laser irradiation from 0.30 to 1.25 w/cm<sup>2</sup>. Inset is the photographs of **Co-NDC** at different irradiation powder monitored by the infrared thermal imager.

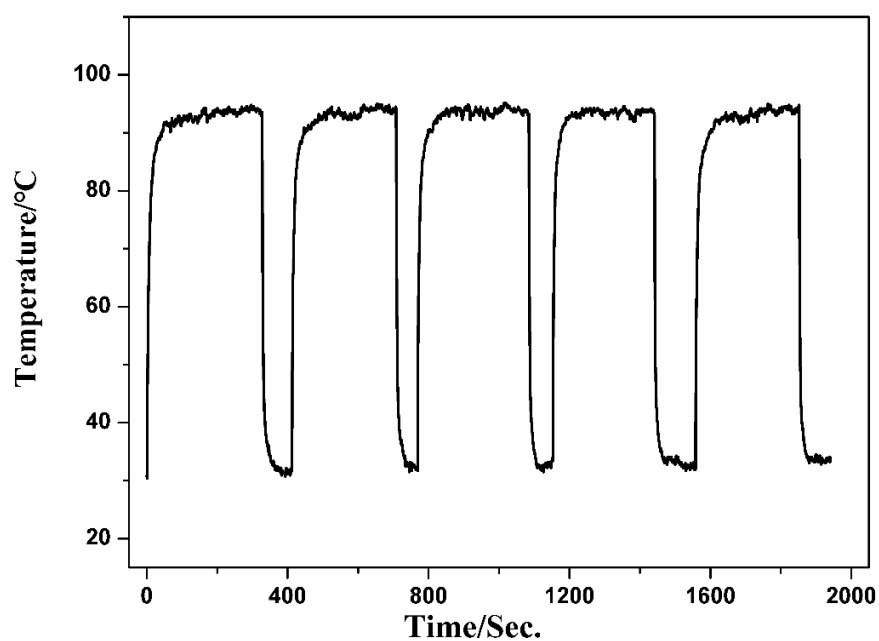

**Figure S13.** Photothermal cycling curve of the **Co-NDC** at 1.25 W/cm<sup>2</sup> irradiation (808 nm).

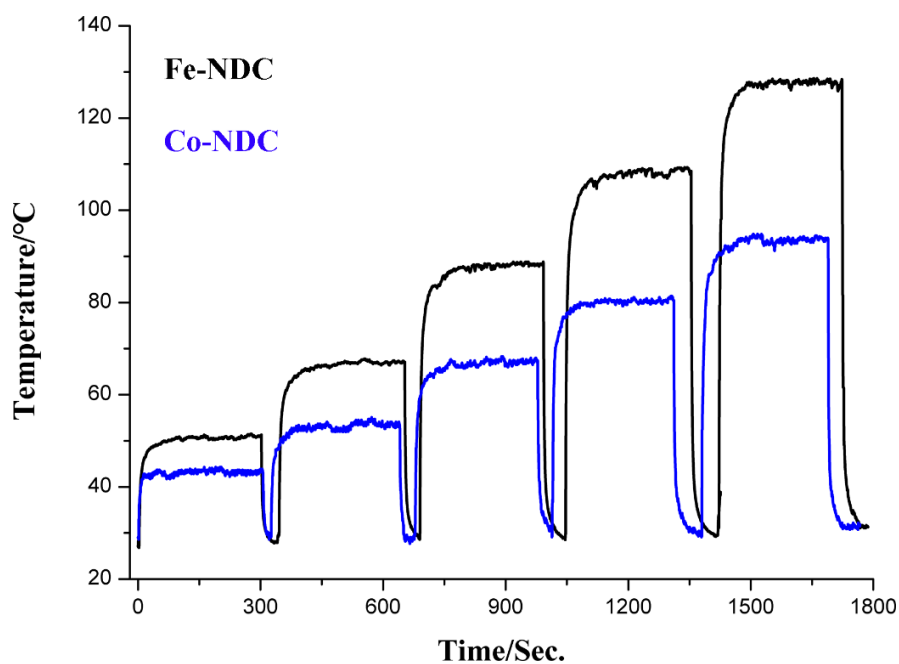

**Figure S14.** Photothermal conversion curves of **Fe-NDC** and **Co-NDC** under 808 nm laser irradiation from 0.30 to 1.25 w/cm<sup>2</sup>.

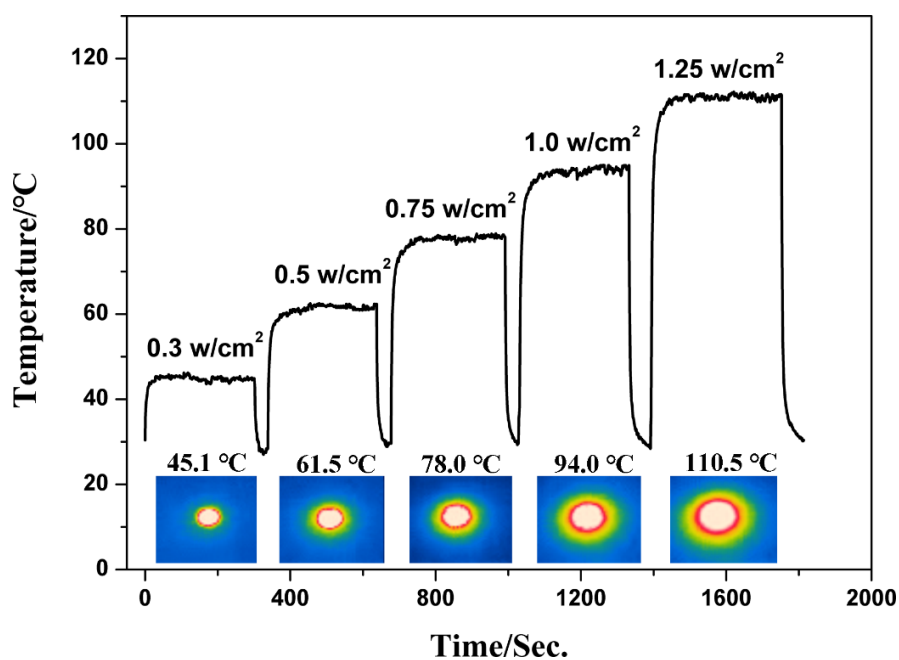

**Figure S15.** Photothermal conversion curves of **Co-NDC** under 1064 nm laser irradiation from 0.30 to 1.25 w/cm<sup>2</sup>. Inset is the photographs of Co-NDC at different irradiation powder monitored by the infrared thermal imager.



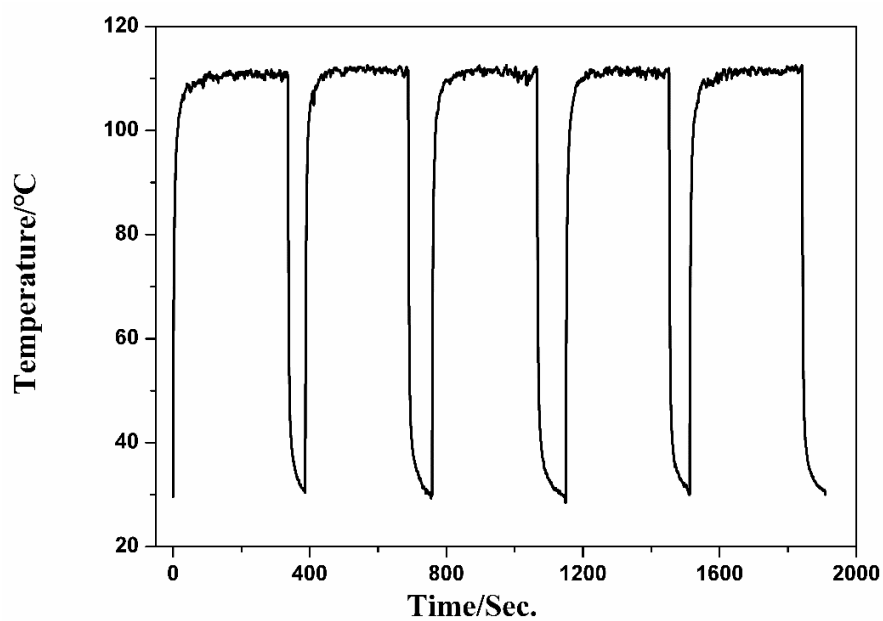

**Figure S16.** Photothermal cycling curve of the **Co-NDC** at 1.25 W/cm<sup>2</sup> irradiation by 1064 nm laser.

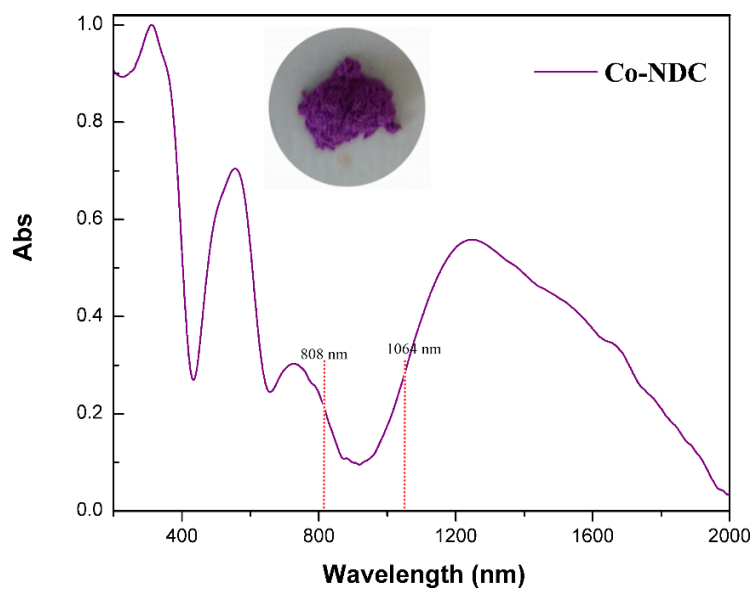

**Figure S17.** Vis spectra of **Co-NDC** in solid state measured at room temperature. Inset is the photograph of the as-made **Co-NDC**.

Table S1. Summary of the photothermal conversion efficiency of various MOF involved photothermal agents.

| UV light source                |                         |                    |                   |           |
|--------------------------------|-------------------------|--------------------|-------------------|-----------|
| Samples                        | Light Intensity         | Temperature ranges | $\Delta T$        | Ref       |
| HKUST-1                        | 0.5 W·cm <sup>-2</sup>  | 25.0-124.7         | 99.3 °C in 30 min | S2        |
| IR-MOF-3                       | 0.5 W·cm <sup>-2</sup>  | 26.4-118.6         | 92.2 °C in 30 min |           |
| ZIF-8                          | 0.5 W·cm <sup>-2</sup>  | 26.1-70.5          | 44.4 °C in 30 min |           |
| UiO-66                         | 0.5 W·cm <sup>-2</sup>  | 25.5-57.3          | 31.8 °C in 30 min |           |
| MIL-101-NH <sub>2</sub> - (Al) | 0.5 W·cm <sup>-2</sup>  | ~24-72 °C          | 48 °C in 30 min   | S3        |
| 800-808 nm laser light source  |                         |                    |                   |           |
| Zr-PDI <sup>-</sup> film       | 0.7 W·cm <sup>-2</sup>  | 25-114 °C          | 89 °C in 200 s    | S4        |
| Ag-2D-CP                       | 0.5 W·cm <sup>-2</sup>  | -                  | 24.5 °C in 3 min  | S5        |
| La-MV-MOF (crystals)           | 2 W·cm <sup>-2</sup>    | 23-111 °C          | 88 °C in 10 s     | S6        |
| La-MV-MOF (film)               | 2 W·cm <sup>-2</sup>    | 23-145 °C          | 122 °C in 200 s   |           |
| Dy- <i>m</i> -TTFTB            | 0.7 W·cm <sup>-2</sup>  | 22.8-90.1 °C       | 67.3 °C in 90 s   | S7        |
| Dy- <i>m</i> -TTFTB            | 0.7 W·cm <sup>-2</sup>  | 23.0-82.3 °C       | 59.3 °C in 15 s   |           |
| Zn-MOF powder                  | 0.4 W·cm <sup>-2</sup>  | 25-255 °C          | 230 °C in 24 s    | S8        |
| Au@MOF                         | 0.8 W·cm <sup>-2</sup>  | 26.5-81.6 °C       | 55.1 in 10 min    | S9        |
| Fe-NDC                         | 0.25 W·cm <sup>-2</sup> | 22.5-50 °C         | 27.5 °C in 10 s   | This work |
|                                | 0.5 W·cm <sup>-2</sup>  | 22.5-67.6 °C       | 45.1 °C in 10 s   |           |
|                                | 0.75 W·cm <sup>-2</sup> | 22.5-88.2 °C       | 65.7 °C in 10 s   |           |
|                                | 1.0 W·cm <sup>-2</sup>  | 22.5-108.7 °C      | 86.2 °C in 10 s   |           |
| 980 and 1064 nm laser light    |                         |                    |                   |           |
| Au@MOF (1064 nm)               | 1.8 W·cm <sup>-2</sup>  | 26.5-100 °C        | 73.5 °C in 10 min | S9        |
| Ru-MOF (980 nm)                | -                       | 26-51.7 °C         | 25.7 °C in 16 min | S10       |
| 1064 nm laser light            |                         |                    |                   |           |
| Fe-NDC                         | 0.25 W·cm <sup>-2</sup> | 25-49 °C           | 24 °C in 10 s     | This work |
|                                | 0.5 W·cm <sup>-2</sup>  | 25-68 °C           | 43 °C in 10 s     |           |
|                                | 0.75 W·cm <sup>-2</sup> | 25-90.1 °C         | 65.1 °C in 10 s   |           |
|                                | 1.0 W·cm <sup>-2</sup>  | 25-110 °C          | 85 °C in 10 s     |           |
|                                | 1.25 W·cm <sup>-2</sup> | 25-135 °C          | 110 °C in 10 s    |           |

## References:

- [S1] T. Yamashita, P. Hayes, Analysis of XPS spectra of Fe<sup>2+</sup> and Fe<sup>3+</sup> ions in oxide materials, *Appl. Surf. Sci.* **2008**, 254, 2441–2449.
- [S2] Espín, J.; Garzón-Tovar, L.; Carné-Sánchez, A.; Imaz, I.; Maspoch, D.; Photothermal Activation of Metal–Organic Frameworks Using a UV–Vis Light Source. *ACS Appl. Mater. Interfaces* **2018**, 10, 9555–9562.

- [S3] Espín, J.; Garzón-Tovar, L.; Boix, G.; Imaz, I.; Maspoch, D. The photothermal effect in MOFs: covalent post-synthetic modification of MOFs mediated by UV-Vis light under solvent-free conditions. *Chem. Commun.* **2018**, *54*, 4184-4187.
- [S4] Lü, B.; Chen, Y.; Li, P.; Wang, B.; Müllen, K.; Yin, M. Stable radical anions generated from a porous perylenediimide metal-organic framework for boosting near-infrared photothermal conversion. *Nat. Commun.* **2019**, *10*, 767.
- [S5] Li, M.-Q.; Zhao, M.; Bi, L.-Y.; Hu, Y.-Q.; Gou, G.; Li, J.; Zheng, Y.-Z. Two-Dimensional Silver(I)-Dithiocarboxylate Coordination Polymer Exhibiting Strong Near-Infrared Photothermal Effect. *Inorg. Chem.* **2019**, *58*, 6601–6608.
- [S6] Wang, S.; Li, S.; Xiong, J.; Lin, Z.; Wei, W.; Xu, Y. Near-infrared photothermal conversion of stable radicals photoinduced from a viologen-based coordination polymer. *Chem. Commun.* **2020**, *56*, 7399-7402.
- [S7] Su, J.; Cai, P.; Yan, T.; Yang, Z.-M.; Yuan, S.; Zuo, J.-L.; Zhou, H.-C. Enhancing the photothermal conversion of tetrathiafulvalene-based MOFs by redox doping and plasmon resonance. *Chem. Sci.* **2022**, *13*, 1657–1664.
- [S8] Yan, T.; Li, Y.-Y.; Gu, Q.-Y.; Li, J.; Su, J.; Wang, H.-Y.; Zuo, J.-L. A Tetrathiafulvalene/Naphthalene Diimide-Containing Metal–Organic Framework with fsc Topology for Highly Efficient Near-Infrared Photothermal Conversion. *Inorg. Chem.* **2022**, *61*, 3078–3085.
- [S9] Deng, X.; Liang, S.; Cai, X.; Huang, S.; Cheng, Z.; Shi, Y.; Pang, M.; Ma, P.; Lin, J. Yolk-Shell Structured Au Nanostar@Metal-Organic Framework for Synergistic Chemo-photothermal Therapy in the Second Near-Infrared Window. *Nano Lett.* **2019**, *19*, 6772-6780.
- [S10] Zhang, T.; Cao, J.-W.; Jiang, X.; Chen, J.; Wang, T.; Chen, K.-J. Band Gap Modulation Enabled by TCNQ Loading in a Ru-Based Metal–Organic Framework for Enhanced Near-Infrared Absorption and Photothermal Conversion. *Cryst. Growth Des.* **2021**, *21*, 729-734.
